# Supplementary material for: High photodetector responsivity and weak light detection in a manganese doped lead-free low dimensional perovskite
Source: Royal Society of Chemistry journal article supplement (doi:10.1039/d4tc04405c), 2024-12-27
Supplement: d4tc04405c1.pdf [file d4tc04405c1.pdf]

## Supporting information

### High photodetector responsivity and weak light detection in Manganese doped lead-free low dimensional perovskite

James Harry Martin,<sup>†a</sup> Zhirong Liu,<sup>†b</sup> Muhammed P.U. Haris,<sup>f</sup> Luis Lezama,<sup>c</sup> Mingkui Wang,<sup>\*b</sup> Shahzada Ahmad,<sup>\*a,e</sup> Samrana Kazim<sup>\*d,a, e</sup>

<sup>a</sup>*BCMaterials, Basque Center for Materials, Applications, and Nanostructures, UPV/EHU Science Park, 48940, Leioa, Spain*

*Email: [shahzada.ahmad@bcmaterials.net](mailto:shahzada.ahmad@bcmaterials.net), [samrana.kazimk@ehu.eus](mailto:samrana.kazimk@ehu.eus)*

<sup>b</sup>*Wuhan National Laboratory for Optoelectronics, School of Optoelectronic Science and Engineering, Huazhong University of Science and Technology, Wuhan 430074 P.R. China Email: [mingkui.wang@hust.edu.cn](mailto:mingkui.wang@hust.edu.cn)*

<sup>c</sup>*Departamento de Química Inorgánica, Facultad de Ciencia y Tecnología, Universidad del País Vasco, UPV/EHU, Sarriena s/n, 48940, Leioa, Spain*

<sup>d</sup>*Materials Physics Center, CSIC-UPV/EHU, Paseo Manuel de Lardizabal 5, 20018, Donostia - San Sebastian, Spain*

<sup>e</sup>*IKERBASQUE, Basque Foundation for Science, Bilbao, 48009, Spain*

<sup>f</sup>*Interdisciplinary Research Center for Sustainable Energy Systems (IRC-SES), King Fahd University of Petroleum and Minerals (KFUPM), Dhahran 31261, Saudi Arabia*

<sup>†</sup> *Equal contribution*

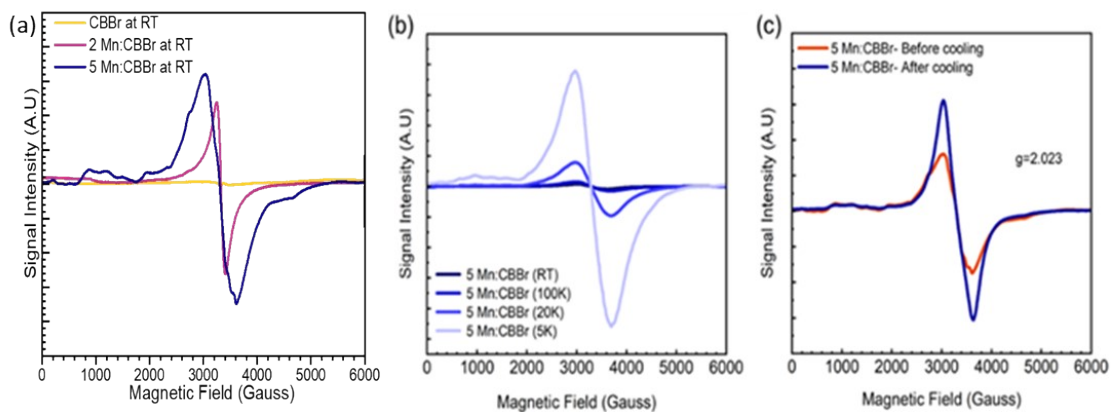

**Figure S1.** EPR spectra of (a) the pristine CBBr, 2Mn:CBBr, and 5Mn:CBBr at room temperature, (b) the temperature dependence EPR for 5Mn:CBBr, and (c) the comparison of EPR signal at room temperature before and after cooling to 5 K under magnetic field.

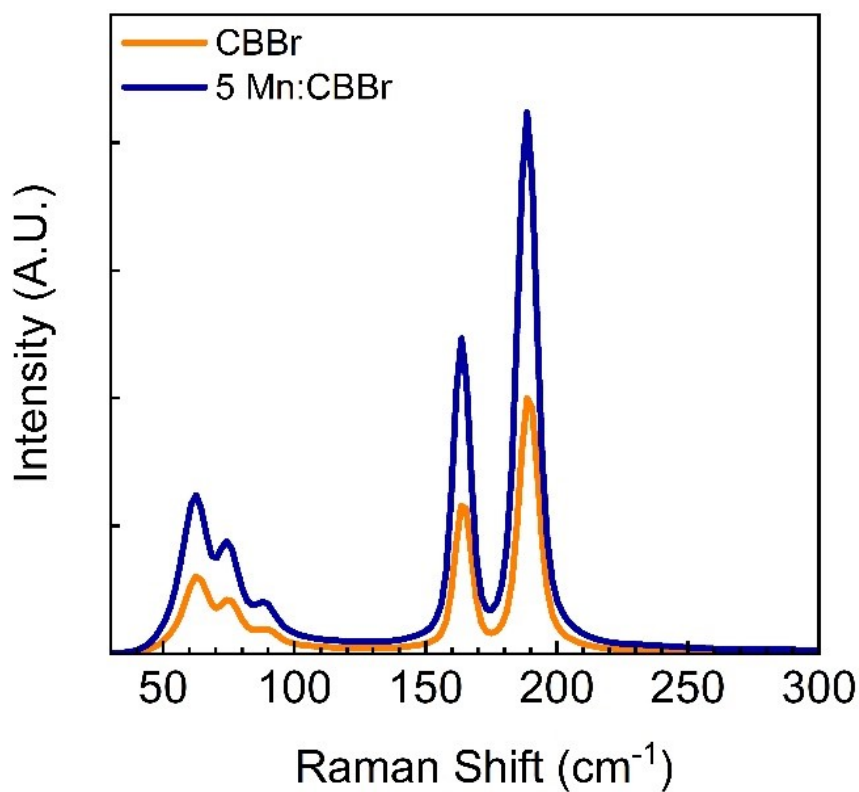

**Figure S2.** Raman spectra of pristine and 5Mn:CBBr powder at room temperature.

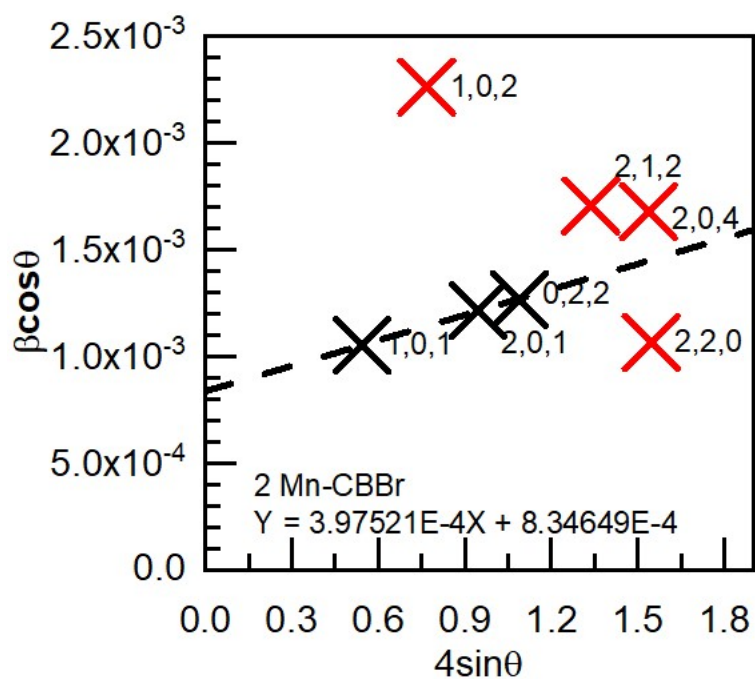

**Figure S3.** Williamson-Hall plot of 2Mn:CBBr powder.

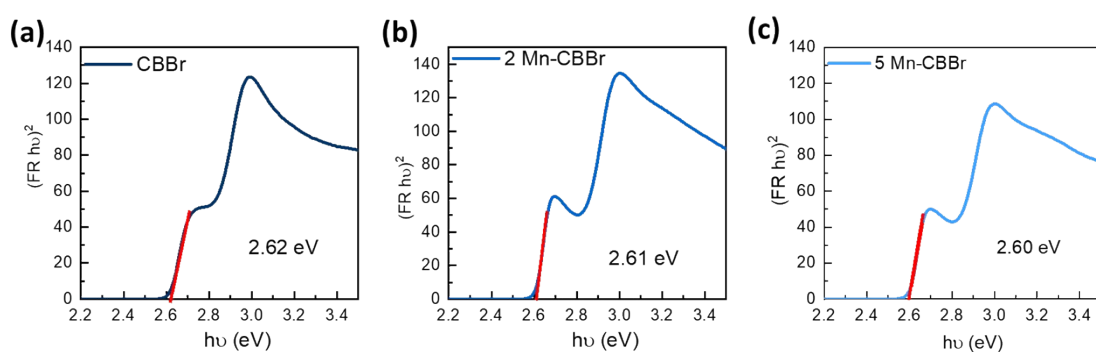

**Figure S4.** Tauc plots derived from diffuse reflectance data for direct band gap calculation of perovskite powders generated from a) CBBr, b) 2Mn:CBBr, and c) 5Mn:CBBr perovskites.

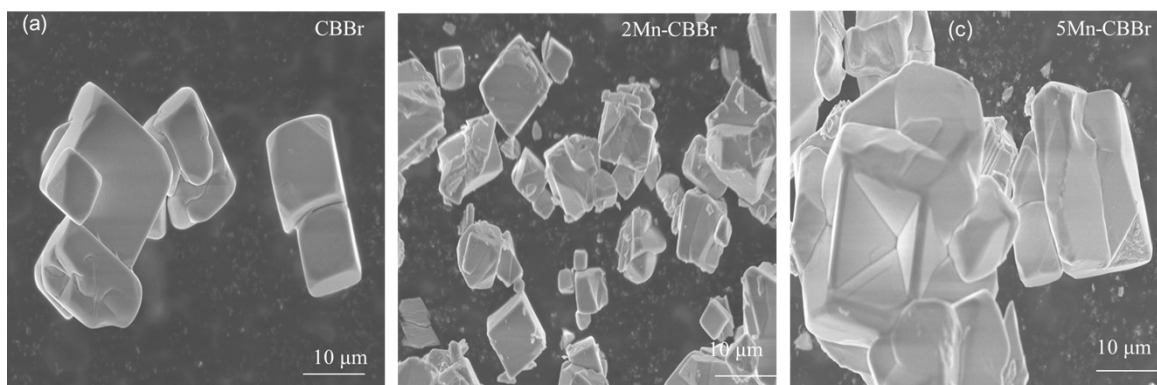

**Figure S5.** The SEM image of (a) pristine, (b) 2Mn:CBBr, and (c) 5Mn:CBBr.

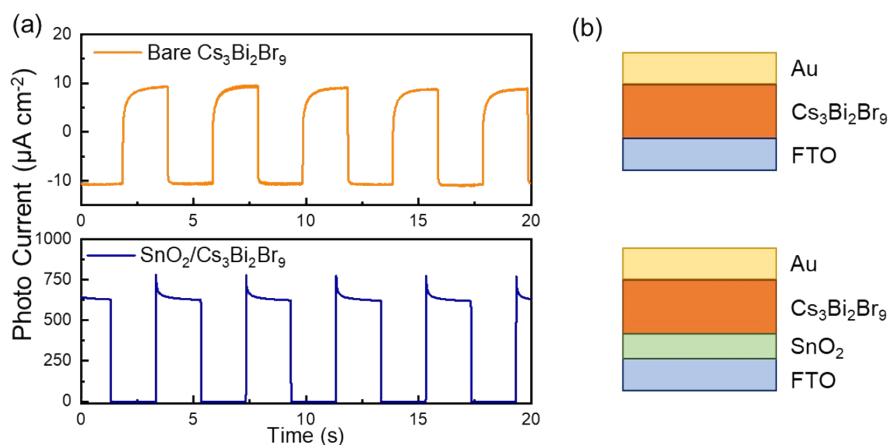

**Figure S6.** (a) Photo-response behavior curve (0 V bias) of the bare CBBr and SnO<sub>2</sub>/CBBr heterojunction PDs (light modulation frequency: 0.5 Hz, wavelength: 375 nm, light intensity: 39 mW cm<sup>-2</sup>), and (b) the corresponding structure profiles of the PDs.

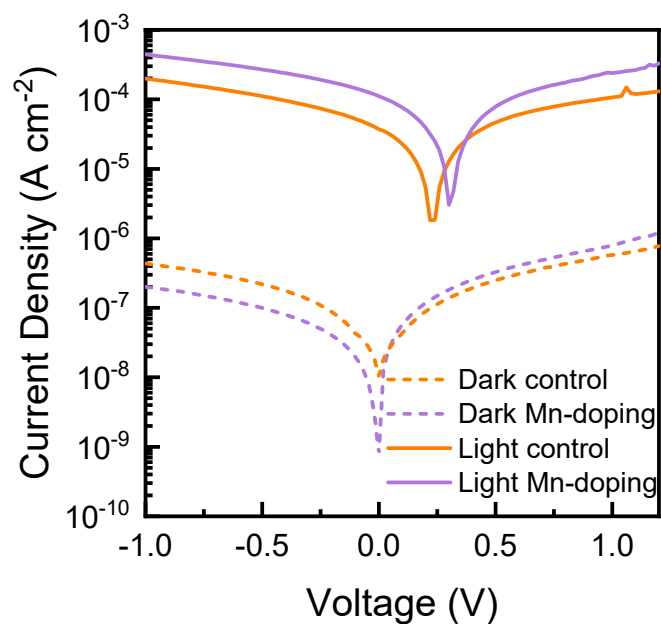

**Figure S7.** The current density under light (3.14 mW cm<sup>-2</sup>) and dark current of the photodetector with and without Mn-doping under a forward scanning from 1.0 to 1.25 V.

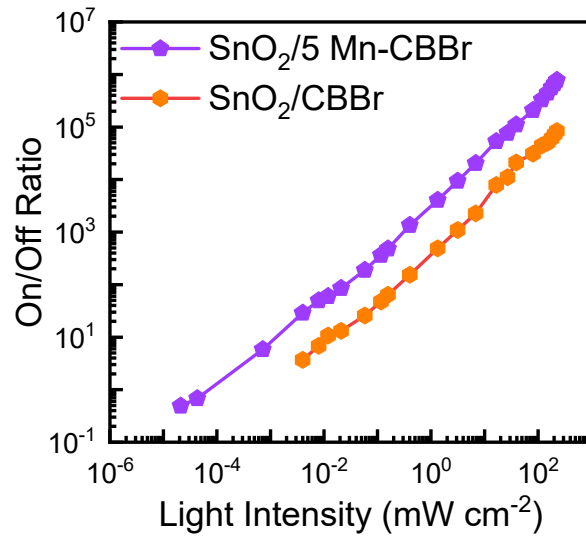

**Figure S8.** Light intensity-dependent On/Off ratio of the optimized SnO<sub>2</sub>/CBBr heterojunction PD with and without Mn-doping.

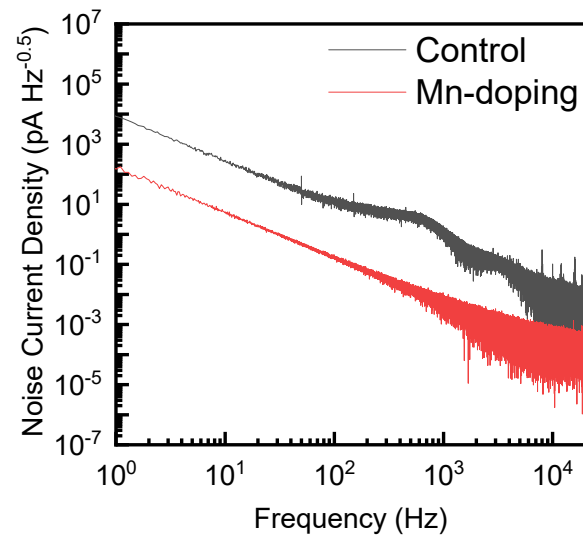

**Figure S9.** The noise current spectral density curves for the control and optimized 5 Mn:CBBr photodetector in a frequency ranging from 1 Hz to  $2 \times 10^4$  Hz.
